# Supplementary material for: Terpyridine-platinum(ii) acetylide complexes bearing pendent coordination units
Source: Royal Society of Chemistry journal article supplement (doi:10.1039/b603603a), 2006-01-01
Supplement: b603603a.pdf [file b603603a.pdf]

## Terpyridine-Platinum(II) Acetylide Complexes Bearing Pendent Coordination Units

Raymond Ziessel,<sup>\*,a</sup> Stéphane Diring,<sup>a</sup> and Pascal Retailleau<sup>b</sup>

### *Supporting Information (3 pages)*

**Table S1:**  $\pi$ - $\pi$  interactions for crystal compound 7

|                     | Cg(I)        | Cg(J)        | [ARU(J)]           | Cg-Cg<br>(Å) | Dihedral<br>angle (°) | Cg(I)_perp<br>on ring J (Å) |
|---------------------|--------------|--------------|--------------------|--------------|-----------------------|-----------------------------|
| <b>Cycle<br/>Pt</b> | <b>Cg(1)</b> | Cg(7)        | 1+X, 1/2-Y, -1/2+Z | 3.889(3)     | 0.87                  | 3.529                       |
|                     | <b>Cg(2)</b> | Cg(6)        | 1+X, 1/2-Y, -1/2+Z | 3.614(4)     | 7.20                  | 3.412                       |
|                     | <b>Cg(3)</b> | Cg(7)        | 1+X, 1/2-Y, -1/2+Z | 3.962(4)     | 3.04                  | 3.604                       |
|                     | <b>Cg(4)</b> | Cg(9)        | 1+X, Y, Z          | 3.872(4)     | 7.77                  | 3.576                       |
| Cycle<br>T          | Cg(6)        | <b>Cg(2)</b> | -1+X, 1/2-Y, 1/2+Z | 3.614(4)     | 7.20                  | 3.511                       |
|                     | Cg(7)        | <b>Cg(1)</b> | -1+X, 1/2-Y, 1/2+Z | 3.888(3)     | 0.87                  | 3.524                       |
|                     | Cg(7)        | <b>Cg(3)</b> | -1+X, 1/2-Y, 1/2+Z | 3.962(4)     | 3.04                  | 3.547                       |
|                     | Cg(8)        | Cg(9)        | -1+X, Y, Z         | 3.620(4)     | 3.33                  | 3.457                       |
| Cycle<br>B          | Cg(9)        | <b>Cg(4)</b> | -1+X, Y, Z         | 3.873(4)     | 7.77                  | 3.647                       |
|                     | Cg(9)        | Cg(8)        | 1+X, Y, Z          | 3.620(4)     | 3.33                  | 3.505                       |

**Figure S1:** packing of the crystal structure for compound 7

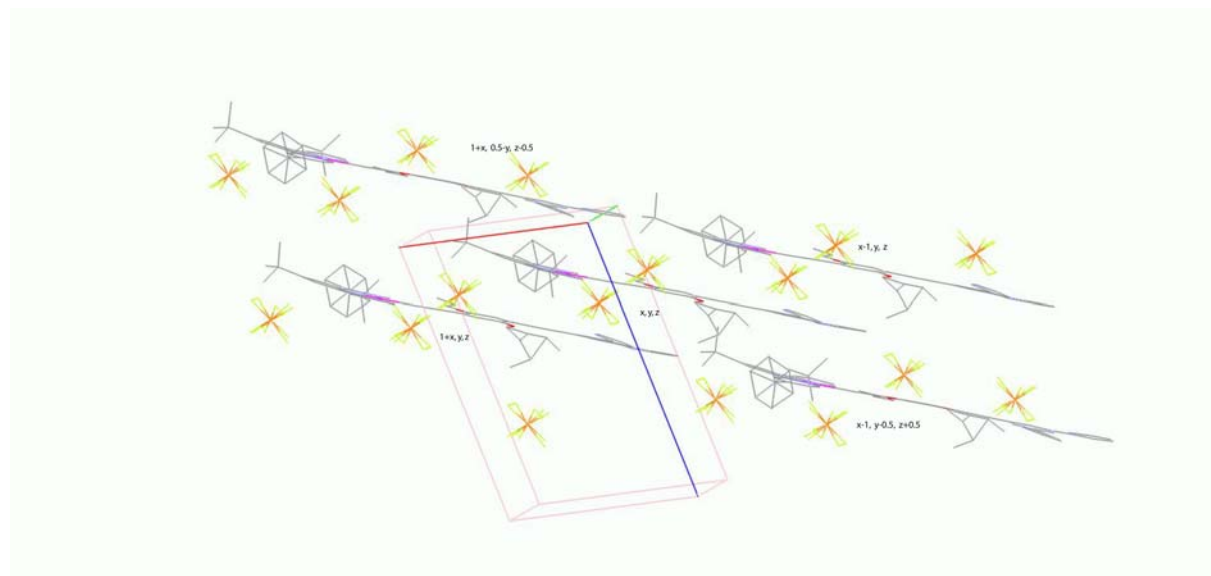

Captions for figure packing

in red, rings from the Pt moiety involved in  $\pi$ - $\pi$  interactions

in green, central phenyl rings

in blue, rings from the t-pyridine moiety

For sake of clarity, main conformations in disorder were shown and PF6

in front of molecules in transparency.

(1)  $1+X, 1/2-Y, -1/2+Z$

(2)  $1+X, Y, Z$

(3)  $-1+X, 1/2-Y, 1/2+Z$

(4)  $-1+X, Y, Z$

**Note:** The elongation of the complex along its main dimension is slightly bent following the propeller geometry of the central phenyl ring (due to aliphatic chain di-substitution ( $C_n, n=4$ )) to let the concave space of the terpyridine moiety accommodate the (tert)butyl group of the neighbour molecule in the same plane ( $2+x, 1/2-y, z-1/2$ ). (distance C53-C28 > distance C53-C38 (23.298Å vs 22.124Å and angle C53-Pt-N6 7.25° vs angle C53-Pt-N4 15.07°)
